# Supplementary material for: Reliability and Minimal Detectable Change Values for Performance-Based Measures of Physical Functioning in the Canadian Longitudinal Study on Aging
Source: PubMed Central journal article supplement — J Gerontol A Biol Sci Med Sci. 2021 Jun 25;76(11):2030–8. doi: 10.1093/gerona/glab175 (PMC8514069; doi:10.1093/gerona/glab175), 2021-06-25
Supplement: glab175_suppl_supplementary_appendix.pdf [file glab175_suppl_supplementary_appendix.pdf]

## Appendix

Table S1 Variance components analysis

| Source of Variance               | TUG (50-64 years) |              | 4-meter gait speed (50-64 years) |              | Single-Leg-Stance (75+ years)-right |              | Single-Leg-Stance (75+ years)-left |              | Single-Leg-Stance (75+ years)-mean |              | Single-Leg-Stance (75+ years)-max |              |
|----------------------------------|-------------------|--------------|----------------------------------|--------------|-------------------------------------|--------------|------------------------------------|--------------|------------------------------------|--------------|-----------------------------------|--------------|
|                                  | variance estimate | % Total      | variance estimate                | % Total      | variance estimate                   | % Total      | variance estimate                  | % Total      | variance estimate                  | % Total      | variance estimate                 | % Total      |
| <b>Between ages</b>              | <i>0.003</i>      | <i>0.18</i>  | <i>0</i>                         | <i>0</i>     | <i>20.002</i>                       | <i>7.86</i>  | <i>2.243</i>                       | <i>0.97</i>  | <i>8.454</i>                       | <i>3.81</i>  | <i>22.866</i>                     | <i>8.16</i>  |
| <b>Between measurement times</b> | <i>0.111</i>      | <i>6.25</i>  | <i>0</i>                         | <i>0.58</i>  | <i>3.873</i>                        | <i>1.52</i>  | <i>0</i>                           | <i>0</i>     | <i>0.801</i>                       | <i>1.33</i>  | <i>4.119</i>                      | <i>1.47</i>  |
| <b>Between raters</b>            | <i>0.032</i>      | <i>1.81</i>  | <i>0.001</i>                     | <i>3.93</i>  | <i>0</i>                            | <i>0</i>     | <i>0</i>                           | <i>0</i>     | <i>0</i>                           | <i>0</i>     | <i>0</i>                          | <i>0</i>     |
| <b>Between participants</b>      | <i>0.617</i>      | <i>34.62</i> | <i>0.005</i>                     | <i>36.67</i> | <i>48.227</i>                       | <i>18.96</i> | <i>90.506</i>                      | <i>39.01</i> | <i>74.21</i>                       | <i>33.47</i> | <i>65.441</i>                     | <i>23.37</i> |
| <b>Residual variance (error)</b> | <i>1.018</i>      | <i>57.14</i> | <i>0.009</i>                     | <i>58.82</i> | <i>182.277</i>                      | <i>71.66</i> | <i>139.287</i>                     | <i>60.03</i> | <i>137.279</i>                     | <i>61.92</i> | <i>187.63</i>                     | <i>67.00</i> |
